# Supplementary material for: Home-based virtual reality for chronic pain: protocol for an NIH-supported randomised-controlled trial
Source: PubMed Central journal article supplement — BMJ Open. 2021 Jun 15;11(6):e050545. doi: 10.1136/bmjopen-2021-050545 (PMC8207994; doi:10.1136/bmjopen-2021-050545), 2021-06-15
Supplement: bmjopen-2021-050545.reviewer_comments.pdf [file bmjopen-2021-050545.reviewer_comments.pdf]

## PEER REVIEW HISTORY

BMJ Open publishes all reviews undertaken for accepted manuscripts. Reviewers are asked to complete a checklist review form (<http://bmjopen.bmj.com/site/about/resources/checklist.pdf>) and are provided with free text boxes to elaborate on their assessment. These free text comments are reproduced below.

## ARTICLE DETAILS

|                            |                                                                                                                                                                                                                                                                                                                                   |
|----------------------------|-----------------------------------------------------------------------------------------------------------------------------------------------------------------------------------------------------------------------------------------------------------------------------------------------------------------------------------|
| <b>TITLE (PROVISIONAL)</b> | Protocol for an NIH-Supported Randomized-Controlled Trial of Home-Based Virtual Reality for Chronic Pain                                                                                                                                                                                                                          |
| <b>AUTHORS</b>             | Birckhead, Brandon; Eberlein, Sam; Alvarez, Genie; Gale, Rebecca; Dupuy, Taylor; Makaroff, Katherine; Fuller, Garth; Liu, Xiaoyu; Yu, Kyung-Sang; Black, JT; Mariko, Ishimori; Venuturupalli, Swamy; Tu, Joseph; Norris, Tom; Tighiouart, Mourad; Ross, Lindsey; McKelvey, Karma; Vrahas, Mark; Danovitch, Itai; Spiegel, Brennan |

This article was not externally reviewed at BMJ Open. Protocols that have been independently assessed prior to submission to BMJ Open are usually fast-tracked to publication on the grounds that further substantial changes will not be possible. This independent assessment will usually be external, independent review for both a substantial grant award from a non-commercial or government funder and ethics approval.
